# Supplementary material for: Lewy body–like pathology in long-term embryonic nigral transplants in Parkinson's disease
Source: Springer Nature journal article supplement (doi:10.1038/nm1747), 2008-04-06
Supplement: 41591_2008_BFnm1747_MOESM22_ESM.pdf [file 41591_2008_BFnm1747_MOESM22_ESM.pdf]

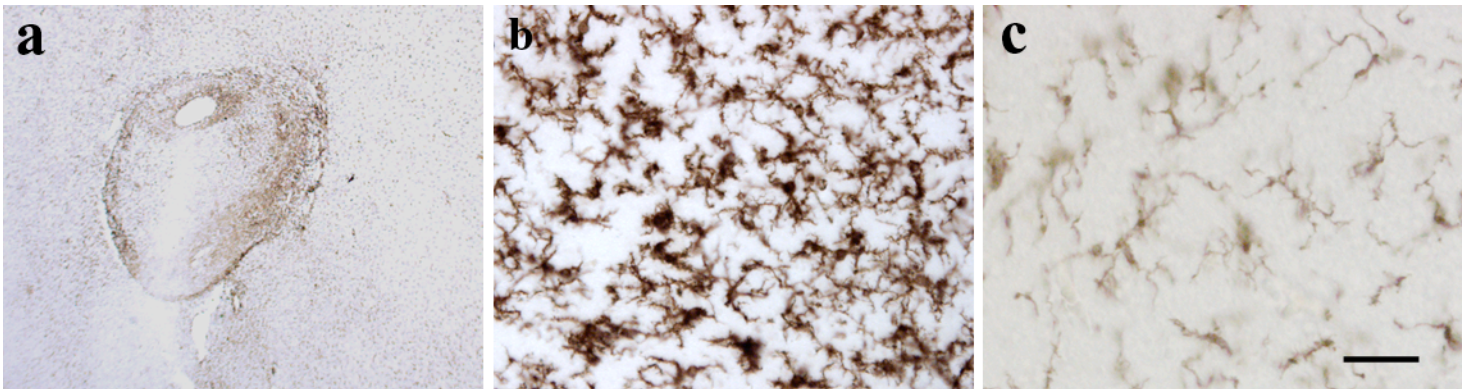

**Supplementary Figure 1:** Inflammatory response in long-term nigral grafts.

(a) Low and (b) high power photomicrographs of CD45 staining through the graft site from the 14 year post-transplant case. Note the intense microglial activation that (c) exceeds what is seen in the host striatum. Scale bar represents the following magnifications: a) 720 $\mu$ m; b) 35 $\mu$ m; c) 35 $\mu$ m.

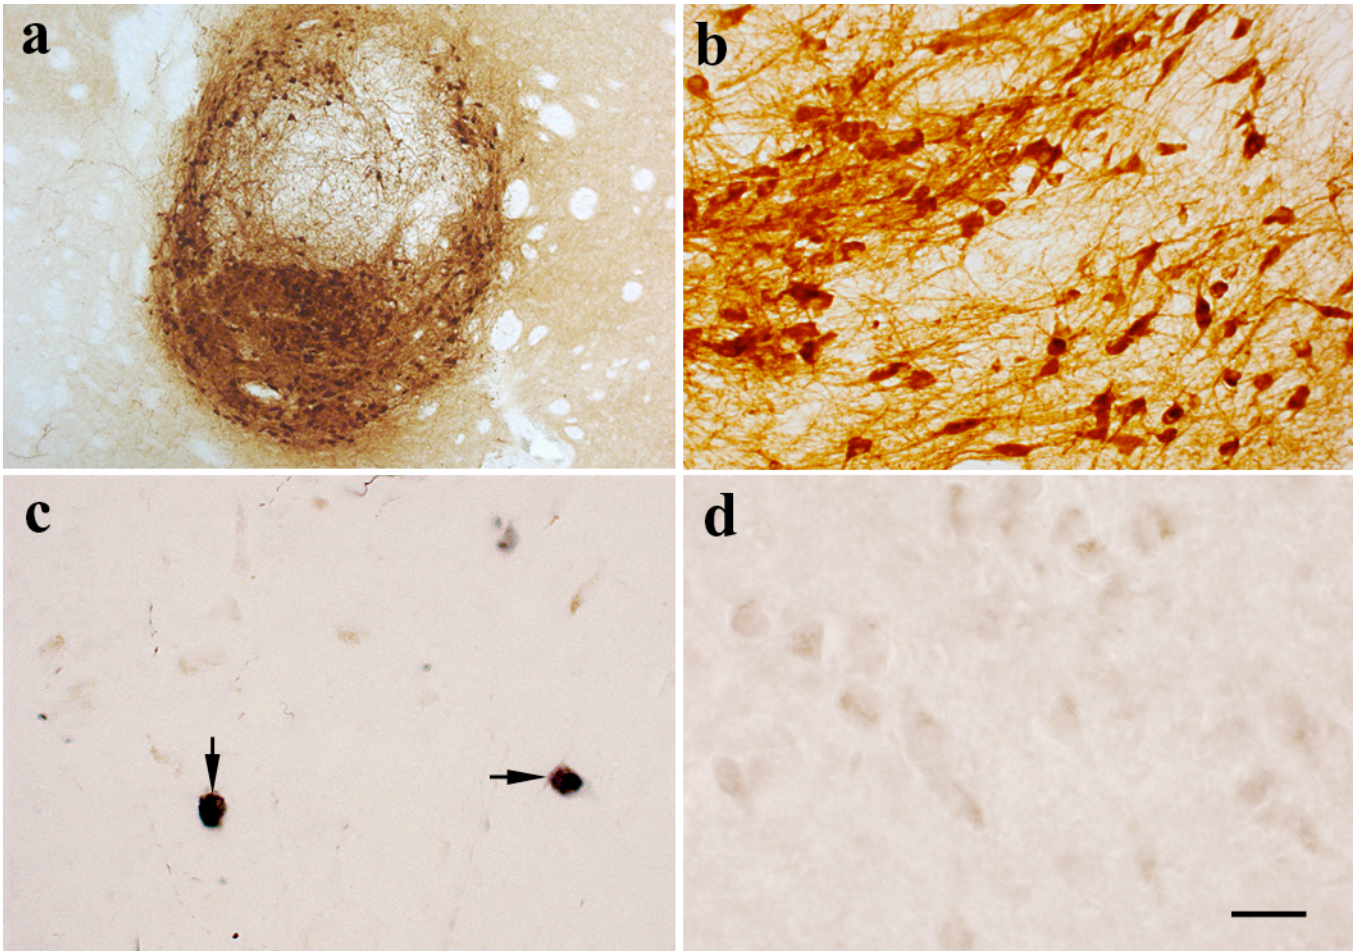

**Supplementary Figure 2: Viability and pathology in 4 year old grafts.**

(a,b) In the four year old graft case, numerous TH-immunoreactive neurons were observed. (c) In the four year post-transplantation case, only rare cytoplasmic alpha-synuclein was observed. (d) In contrast to the 14 year post-mortem case, ubiquitinated-stained aggregates were never seen in the 4 year post-transplant case. Scale bar in d represents the following magnifications: a=360 $\mu$ m; b and d=40 $\mu$ m, c=80 $\mu$ m,
